# Supplementary material for: Inner Leaf Gel of Aloe striata Induces Adhesion-Reducing Morphological Hyphal Aberrations
Source: MDPI journal article supplement (doi:10.3390/jof4010023), 2018-02-08
Supplement: s1 [file s1]

## Supplementary Materials

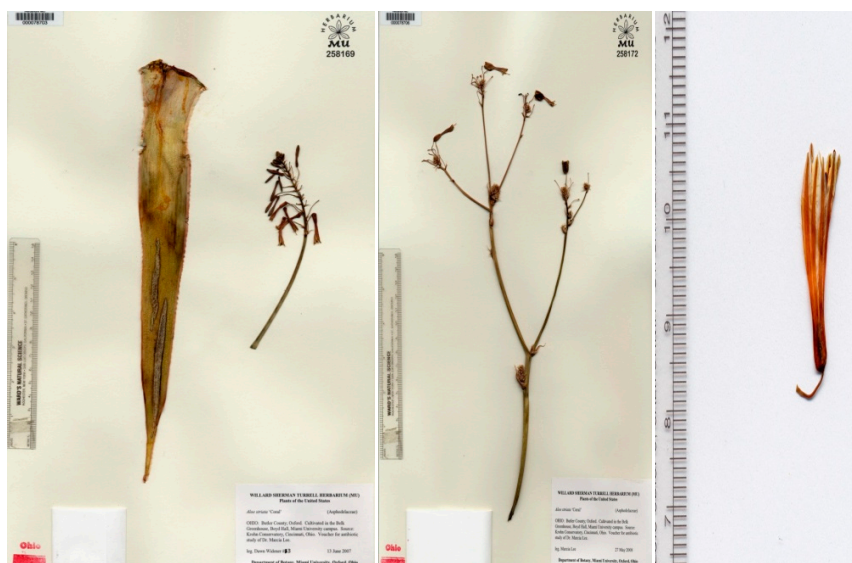

**Figure S1.** *A. striata* voucher (MU25872) deposited at the Willard Turrell Herbarium (Miami University, Oxford, OH).

**Table S1.** Total number of *P. variotii* strains, Pv19, Pv06, and Pv23 adhered to control and treatment slides before slides were washed with RO water in adhesion assays where  $\Delta$  denotes difference between controls and treatments where positive change value implies an increase and negative change value implies a decrease.

| Strain | Total fungi on slides before adhesion assay washing step |           | $\Delta$ |
|--------|----------------------------------------------------------|-----------|----------|
|        | Control                                                  | Treatment |          |
| Pv19   | 5696.0                                                   | 1348.0    | -4348.0  |
| Pv06   | 1742.0                                                   | 422.0     | -1320.0  |
| Pv23   | 7236.0                                                   | 1161.0    | -6075.0  |

**Table S2.** Total number of adhered fungi for each morphotype after exposure to *A. striata* before slides were washed with RO water in adhesion assays for 3 strains of *P. variotii*, Pv19, Pv06, and Pv23. NA = non-aberrated, SP = swollen with parallel cell walls, SNPM = swollen with non-parallel cell walls up to the hyphal midpoint, SNPL = swollen with non-parallel cell walls throughout the hyphal length, SNPSC = swollen with non-parallel cell walls in the sub conidial hyphal region.

| Strain | Pre-wash total adhered <i>A. striata</i> treated fungi of each morphotype (N) |       |       |      |       |
|--------|-------------------------------------------------------------------------------|-------|-------|------|-------|
|        | NA                                                                            | SP    | SNPM  | SNPL | SNPSC |
| Pv19   | 8.0                                                                           | 301.0 | 281.0 | 48.0 | 530.0 |
| Pv06   | 6.0                                                                           | 7.0   | 15.0  | 3.0  | 272.0 |
| Pv23   | 88.0                                                                          | 75.0  | 74.0  | 17.0 | 844.0 |
